# Supplementary material for: Divergent outcomes of gut microbiota alteration upon use of spectrum antibiotics in high sugar diet-induced diabetes in rats
Source: Royal Society of Chemistry journal article supplement (doi:10.1039/c8ra03774d), 2018-01-01
Supplement: c8ra03774d1.pdf [file c8ra03774d1.pdf]

## Supplementary Figures

**Figure S1: Effect of gut microflora modulation on physiological parameters and OGTT**

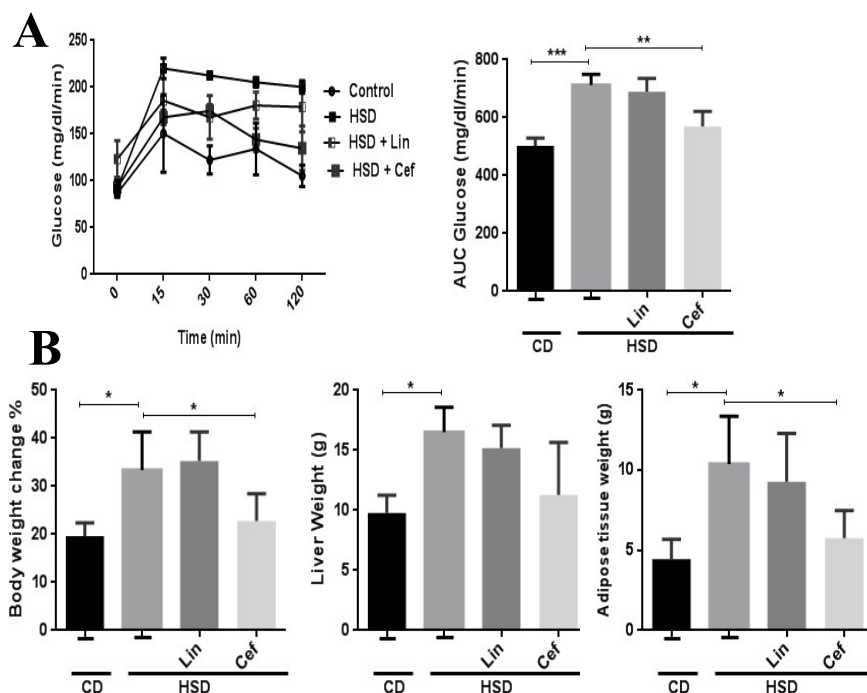

**The Effect of gut microflora modulation on OGTT and physiological parameters after 12 weeks of experimental period** (A) OGTT assay graph and Area under curve (AUC) of glucose for all the experimental animals (B) Effect on body weight, adipose tissue weight and liver weight. Data are presented as means with SD (n=4). Performed One way Anova using graphpad prism 6 where \* presents  $p < 0.05$ , \*\* $p < 0.01$  and \*\*\* $p < 0.001$ . CD, control diet group; HSD, high sucrose fed group.

**Figure S2: Effect of gut microflora modulation on adipose tissue histology**

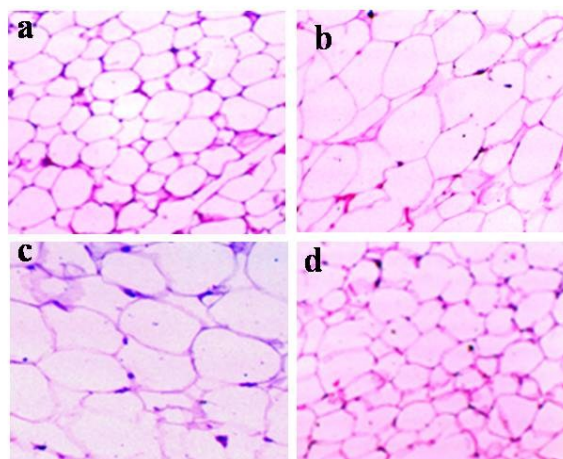

**Effect of gut microflora alteration on adipose tissue histopathology:** Effect of altering the gut microflora using spectrum specific antibiotics was studied on adipose tissue histopathology (a) CD (b) HSD (c) Linezolid along with HSD (d) Cefdinir along with HSD

## Supplementary tables

**Table S1: Experimental Diet Composition**

| <b>Ingredients (%)</b> | <b>Control diet (100 g)</b> | <b>High Sucrose diet (100 g)</b> |
|------------------------|-----------------------------|----------------------------------|
| Starch                 | 65                          | 0                                |
| Sucrose                | 0                           | 65                               |
| Casein                 | 20                          | 20                               |
| Groundnut Oil          | 5                           | 5                                |
| Wheat Bran             | 5                           | 5                                |
| Mineral Mix            | 3.5                         | 3.5                              |
| Vitamin Mix            | 1                           | 1                                |
| D-Methionine           | 0.3                         | 0.3                              |
| Choline Chloride       | 0.2                         | 0.2                              |

**Table S2: 16S rRNA gene specific primers for bacterial quantification**

| <b>Primers</b>               | <b>Orders</b> | <b>Sequence (5'-3')</b>       | <b>Amplicon size (bps)</b> |
|------------------------------|---------------|-------------------------------|----------------------------|
| <b>Phylum</b>                |               |                               |                            |
| <b>Firmicutes</b>            | Forward       | 5'-ATGTGGTTTAATTTCGAAGCA-3'   | 126                        |
|                              | Reverse       | 5'-AGCTGACGACAACCATGCAC-3'    |                            |
| <b>Bacteroidetes</b>         | Forward       | 5'-CATGTGGTTTAATTTCGATGAT-3'  | 126                        |
|                              | Reverse       | 5'-AGCTGACGACAACCATGCAG-3'    |                            |
| <b>Proteobacteria</b>        | Forward       | 5'-CATGACGTTACCCGCAGAAGAAG-3' | 195                        |
|                              | Reverse       | 5'-CTCTACGAGACTCAAGCTTGC-3'   |                            |
| <b>Genus</b>                 |               |                               |                            |
| <b><i>Lactobacilli</i></b>   | Forward       | 5'-TGGAAACAGRTGCTAATACCG-3'   | 224                        |
|                              | Reverse       | 5'-GTCCATTGTGGAAGATTCCC-3'    |                            |
| <b><i>Bifidobacteria</i></b> | Forward       | 5'-GCGTGCTTAACACATGCAAGTC-3'  | 136                        |
|                              | Reverse       | 5'-CACCCGTTTCCAGGAGCTATT-3'   |                            |
| <b><i>Clostridia</i></b>     | Forward       | 5'-GCACAAGCAGTGGAGT-3'        | 239                        |
|                              | Reverse       | 5'-CTTCCTCCGTTTTGTCAA-3'      |                            |
| <b><i>Escherichia</i></b>    | Forward       | 5'-CATGCCGCGTGTATGAA-3'       | 126                        |
|                              | Reverse       | 5'-CGGGTAACGTCAATGAGC-3'      |                            |

**Table S3: mRNA specific primers for gene expression analysis**

| <b>Primers</b> | <b>Accession Number</b> | <b>Strand</b> | <b>Sequence (5'-3')</b>         | <b>Amplicon size (bp)</b> |
|----------------|-------------------------|---------------|---------------------------------|---------------------------|
| <i>Tlr2</i>    | NM_198769               | Forward       | 5'-TGCAGAGCAACGATGGAGAAA-3'     | 222                       |
|                |                         | Reverse       | 5'-ACAGCAGCGTCAGGGTGAAG-3'      |                           |
| <i>Tlr4</i>    | NM_019178               | Forward       | 5'-GGCTGTGGAGACAAAAATGACCTC-3'  | 272                       |
|                |                         | Reverse       | 5'-AGGCTTGGGCTTGAATGGAGTC-3'    |                           |
| <i>Nlr1</i>    | XM_575485               | Forward       | 5'-GTCATCCGGACCAAACTA-3'        | 189                       |
|                |                         | Reverse       | 5'-CTGCCAGGTTTTTCATTGTT-3'      |                           |
| <i>Nlr2</i>    | XM_226330               | Forward       | 5'-ATCCCTCGGTTACTATGTTG-3'      | 241                       |
|                |                         | Reverse       | 5'-GCTTCCTGAATACTCCTCCT-3'      |                           |
| <i>Nf-κB</i>   | NM_199267.2             | Forward       | 5'-CCCCACGAGCTTGTAGGAAAG-3'     | 130                       |
|                |                         | Reverse       | 5'-CCAGGTTCTGGAACTGTGGAT-3'     |                           |
| <i>Glut4</i>   | D28561.1                | Forward       | 5'-GGGCTGTGAGTGAGTGCTTTC-3'     | 150                       |
|                |                         | Reverse       | 5'-CAGCGAGGCAAGGCTAGA-3'        |                           |
| <i>Glp1</i>    | NM_012728.1             | Forward       | 5'-TCTCTTCTGCAACCGAACCT-3'      | 350                       |
|                |                         | Reverse       | 5'-CTGGTGCAGTGCAAGTGTCT-3'      |                           |
| <i>Gpr43</i>   | U92802.1                | Forward       | 5'-TCACCTGGATGAGCTTCGAC-3'      | 359                       |
|                |                         | Reverse       | 5'-GACAAGGACCACTGCGAAGA-3'      |                           |
| <i>Tnf-α</i>   | NM_012675.3             | Forward       | 5'-TCGAGTGACAAGCCTGTAG-3'       | 230                       |
|                |                         | Reverse       | 5'-GTTGGTTGTCTTTGAGATCC-3'      |                           |
| <i>Il6</i>     | NM_012589.2             | Forward       | 5'-GTTGCCTTCTTGGGACTGATG-3'     | 256                       |
|                |                         | Reverse       | 5'-GGGAGTGGTATCCTCTGTGAAGTCT-3' |                           |
| <i>β-actin</i> | NM_031144.3             | Forward       | 5'-GGAATCCTGTGGCATCCATGAAAC-3'  | 315                       |
|                |                         | Reverse       | 5'-TAAAACGCAGCTCAGTAACAGTCCG-3' |                           |
